# Supplementary material
Source: PubMed Central journal article supplement (PMC7157181)
Supplement: jama-323-1353-s003.pdf [file jama-323-1353-s003.pdf]

## Supplementary Online Content

Petrie MC, Verma S, Docherty KF, et al. Effect of dapagliflozin on worsening heart failure and cardiovascular death in patients with heart failure with and without diabetes. *JAMA*. Published online March 27, 2020. doi:10.1001/jama.2020.1906

**eFigure 1.** Primary and secondary cardiovascular endpoints in the overall population and according to diabetes status

**eFigure 2.** Exploratory analysis of the primary composite outcome by tertile of glycated haemoglobin in those without diabetes at baseline

**eFigure 3.** Effect of dapagliflozin, compared with placebo on cardiovascular death and death from any cause according to baseline glycated haemoglobin as a continuous variable

**eFigure 4.** Boxplot of laboratory measurements and vital signs by diabetes status over time

This supplementary material has been provided by the authors to give readers additional information about their work.

**eFigure 1. Primary and secondary cardiovascular endpoints in the overall population and according to diabetes status**

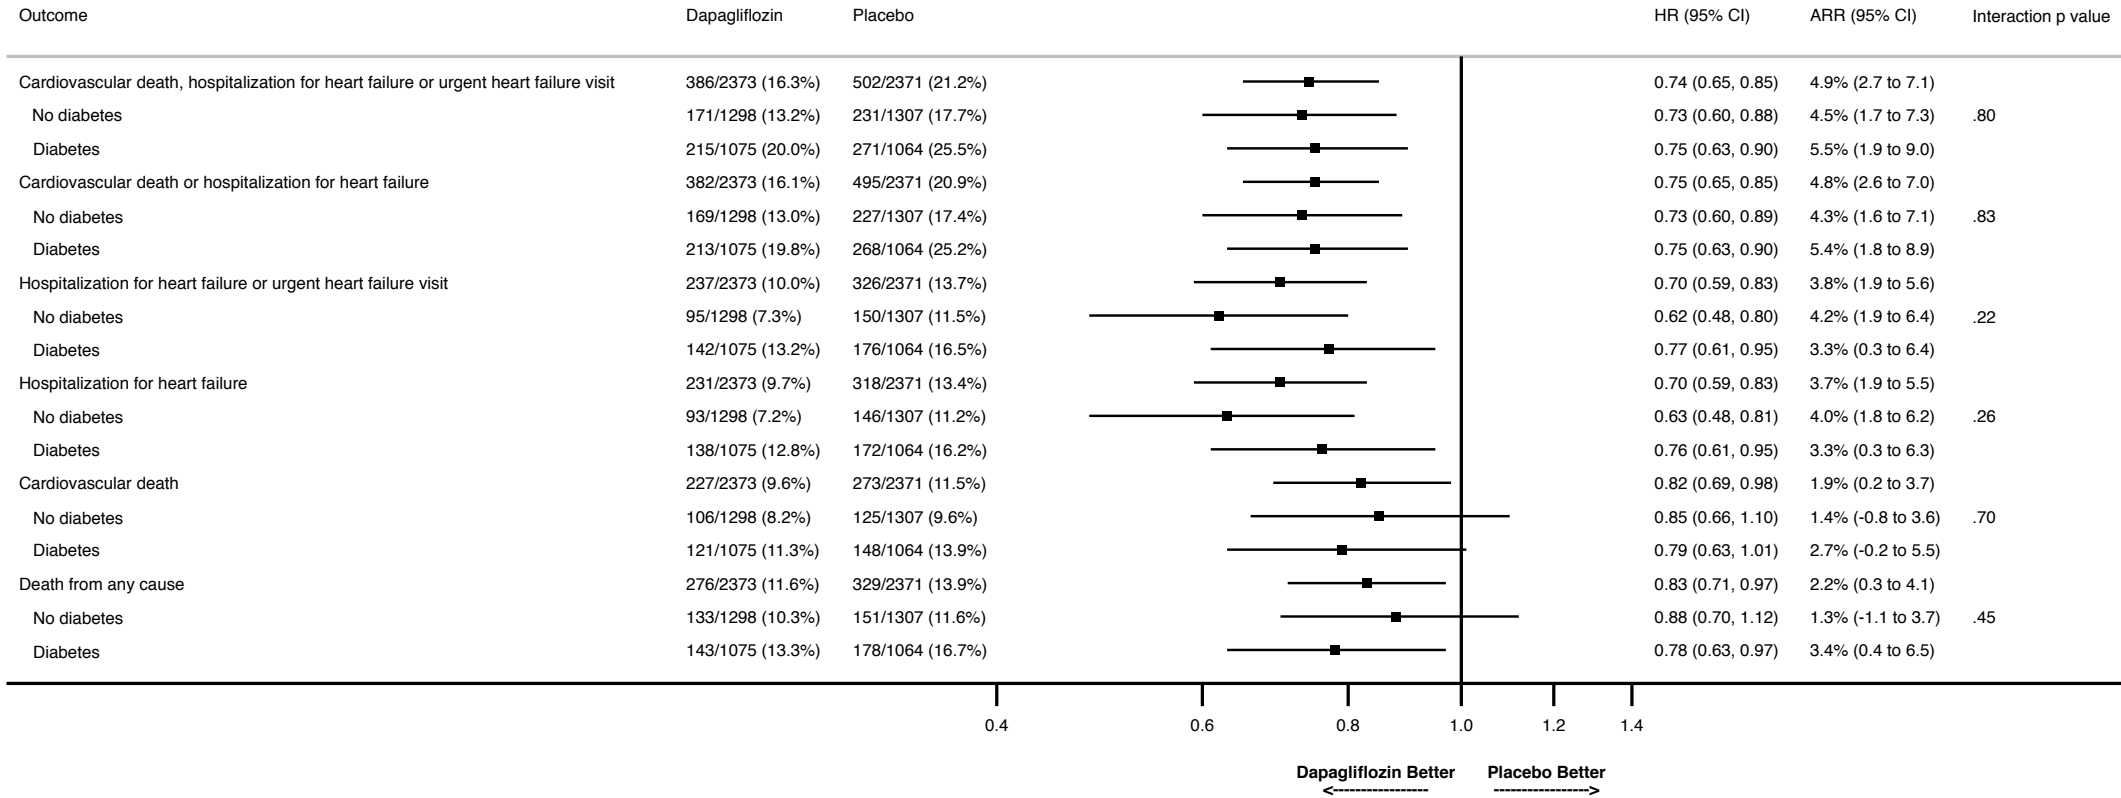

ARR, absolute risk reduction; CI, confidence intervals; HR, hazard ratio.

**eFigure 2. Exploratory analysis of the primary composite outcome by tertile of glycated haemoglobin in those without diabetes at baseline**

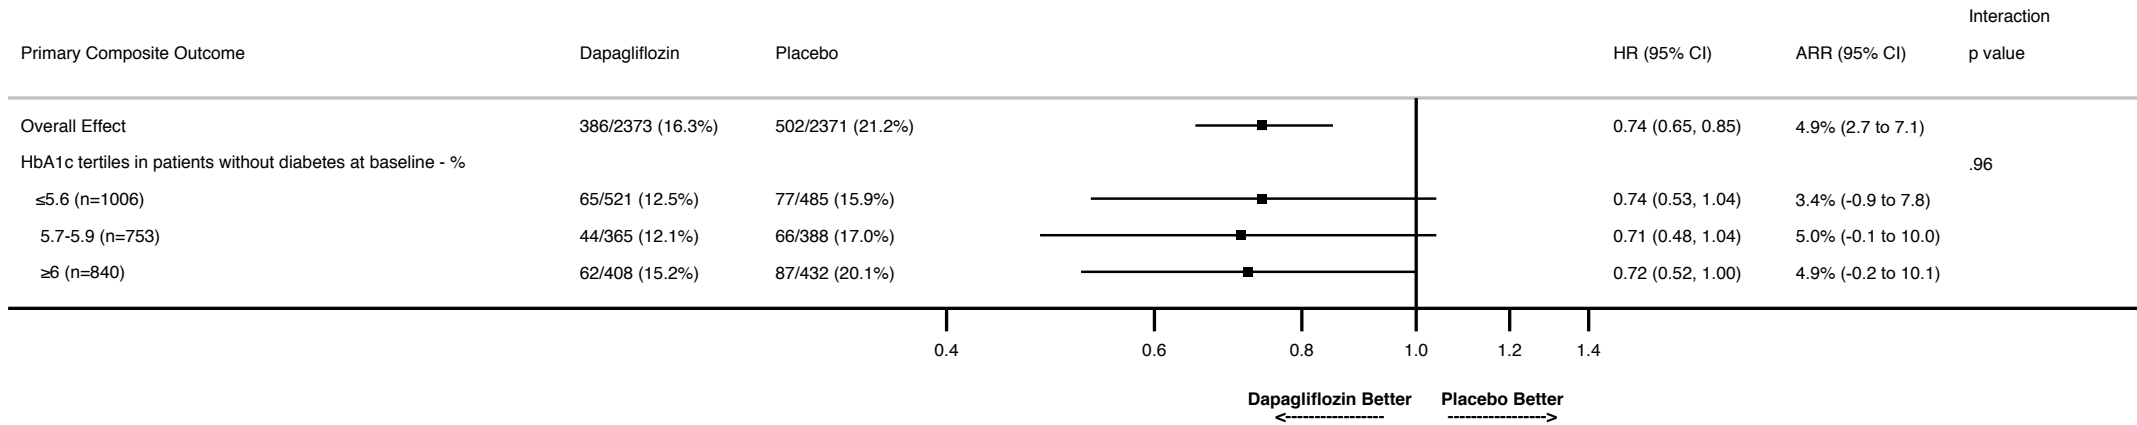

ARR, absolute risk reduction; CI, confidence intervals; HR, hazard ratio.

**eFigure 3. Effect of dapagliflozin, compared with placebo on cardiovascular death and death from any cause according to baseline glycated haemoglobin as a continuous variable.**

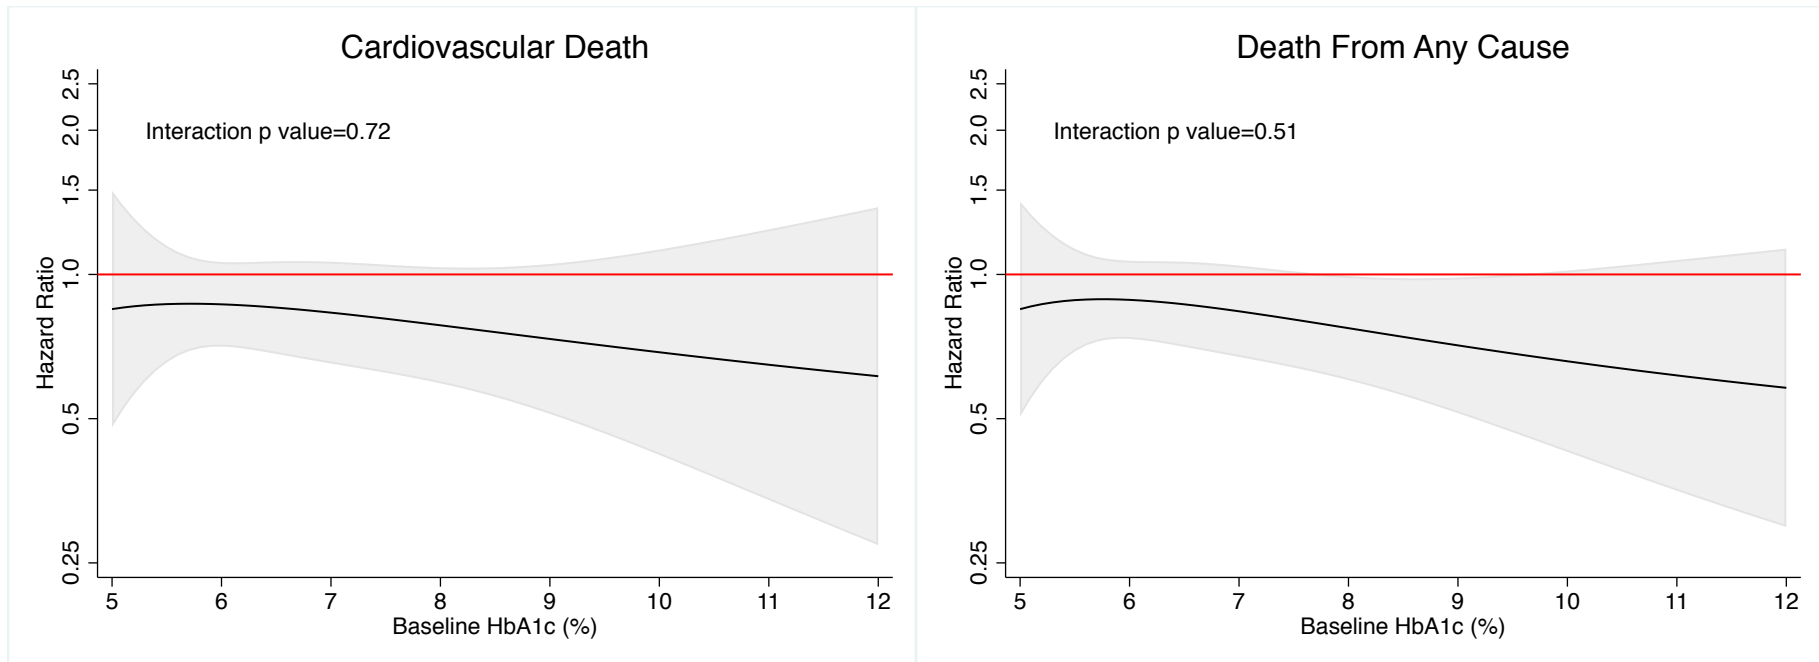

**eFigure 4: Boxplot of laboratory measurements and vital signs by diabetes status over time**

Panel A) Glycated haemoglobin; B) Weight; C) Systolic blood pressure; D) Estimated glomerular filtration rate; E) Hematocrit. The diamonds and triangles indicate the unadjusted mean, the solid lines indicate the median (Q1, Q3), and the dashed lines indicate the median value at baseline.

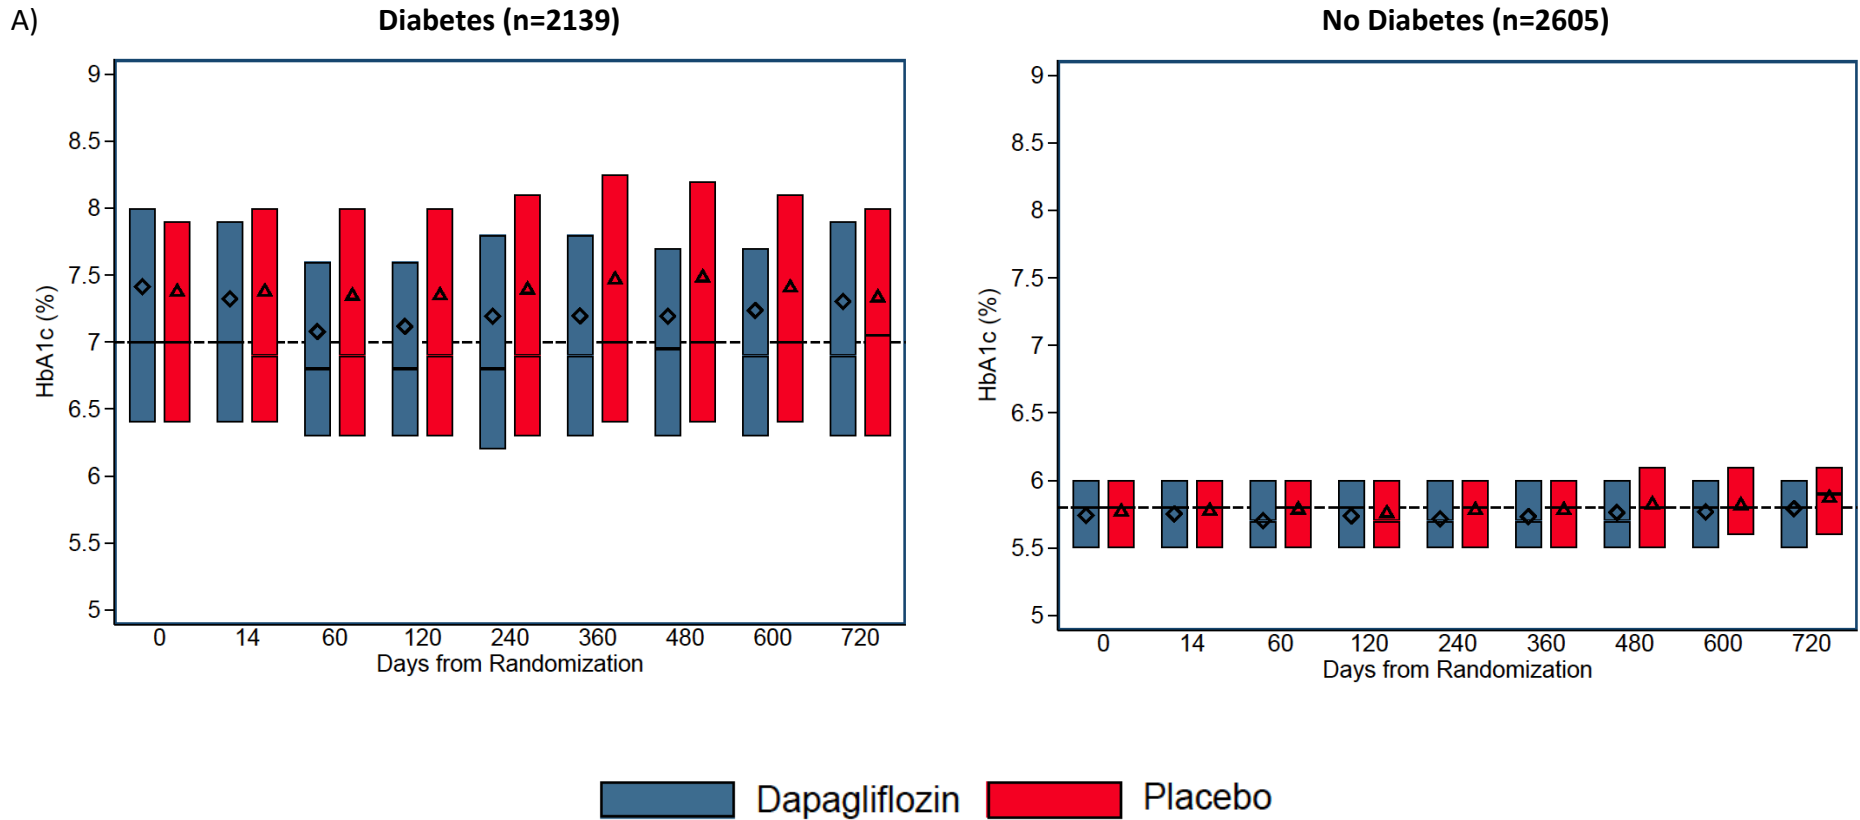

B)

Diabetes (n=2139)

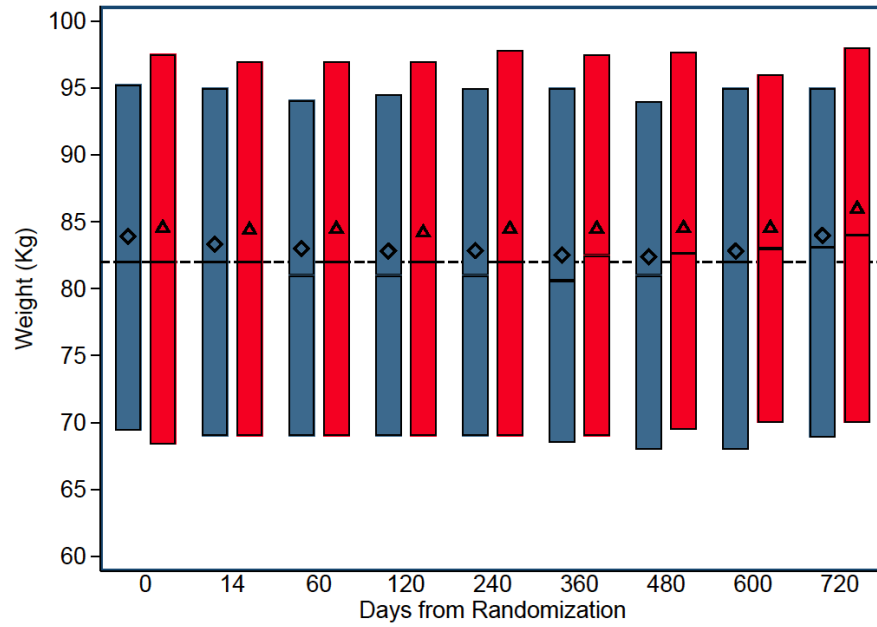

No Diabetes (n=2605)

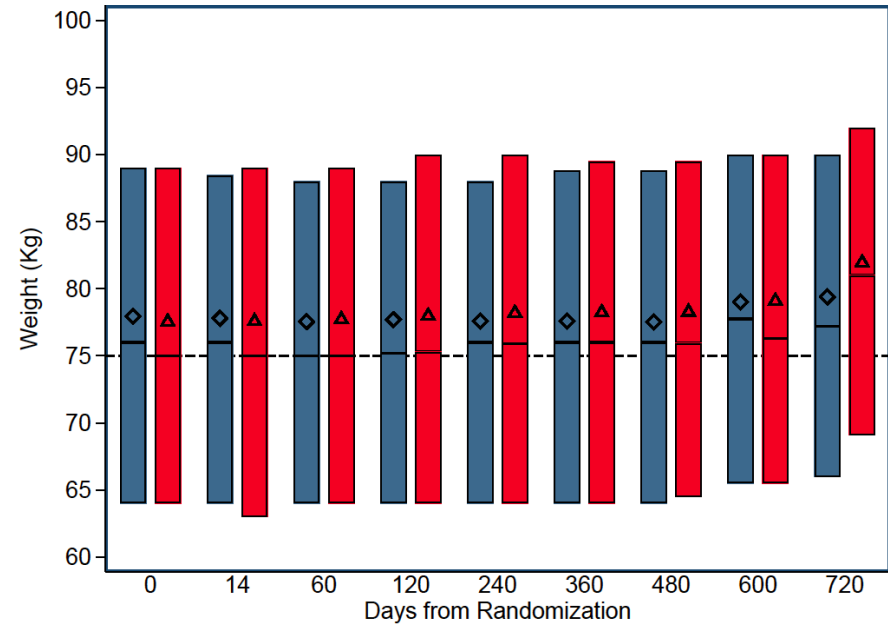

Dapagliflozin Placebo

C)

Diabetes (n=2139)

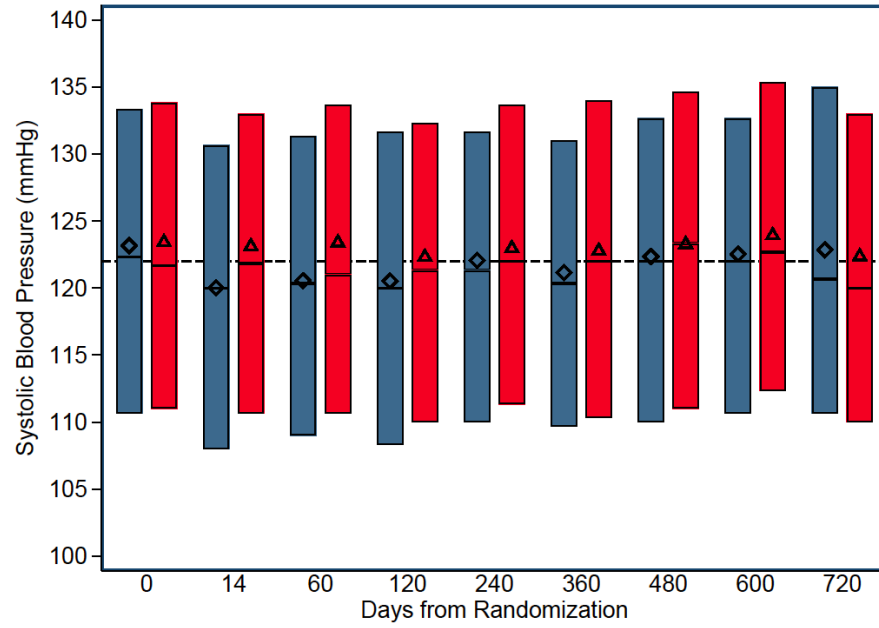

No Diabetes (n=2605)

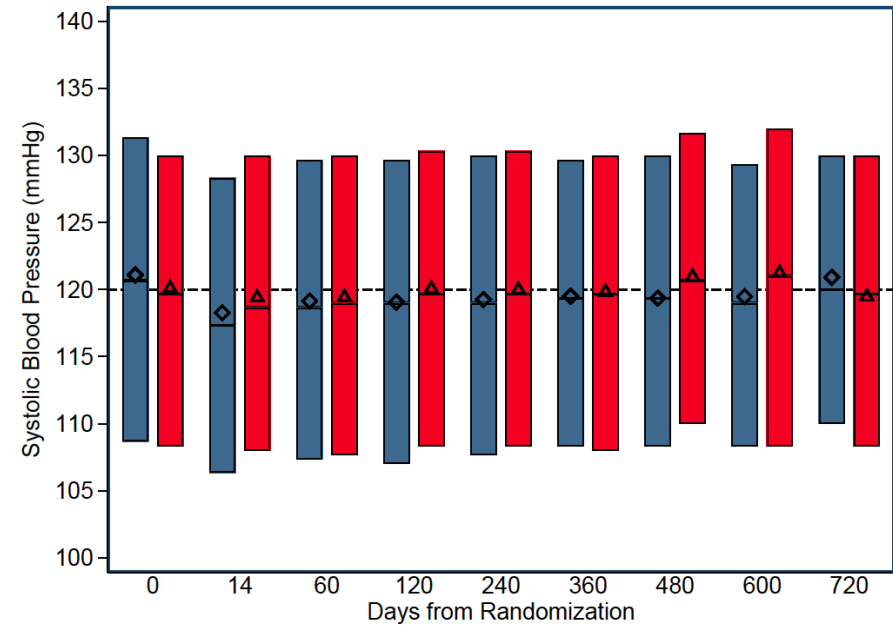

 Dapagliflozin  Placebo

D)

Diabetes (n=2139)

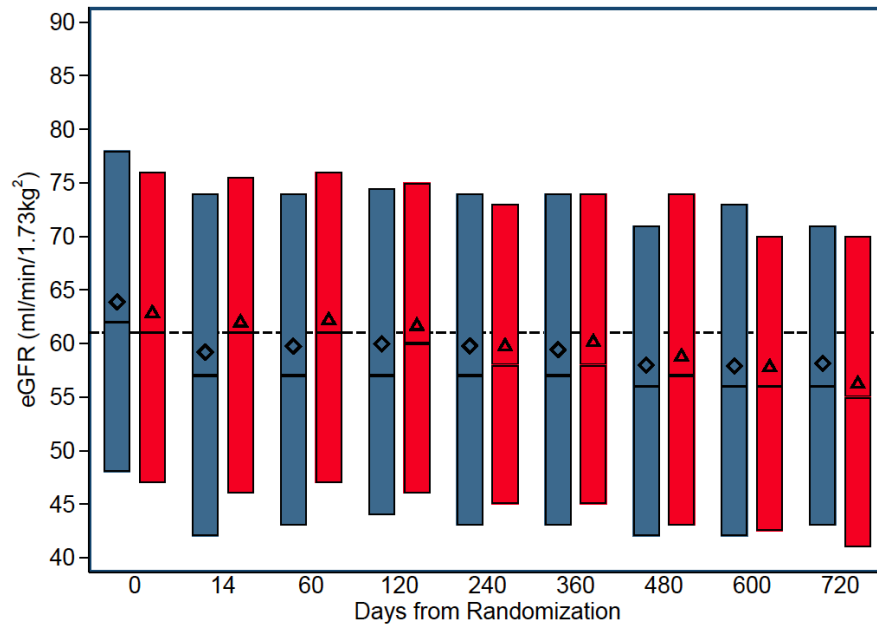

No Diabetes (n=2605)

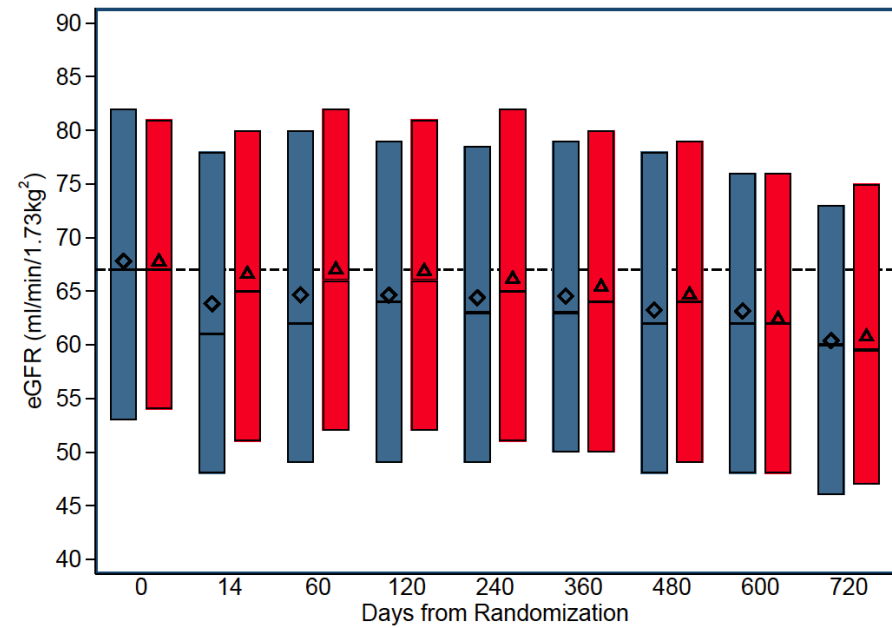

■ Dapagliflozin ■ Placebo



E)

Diabetes (n=2139)

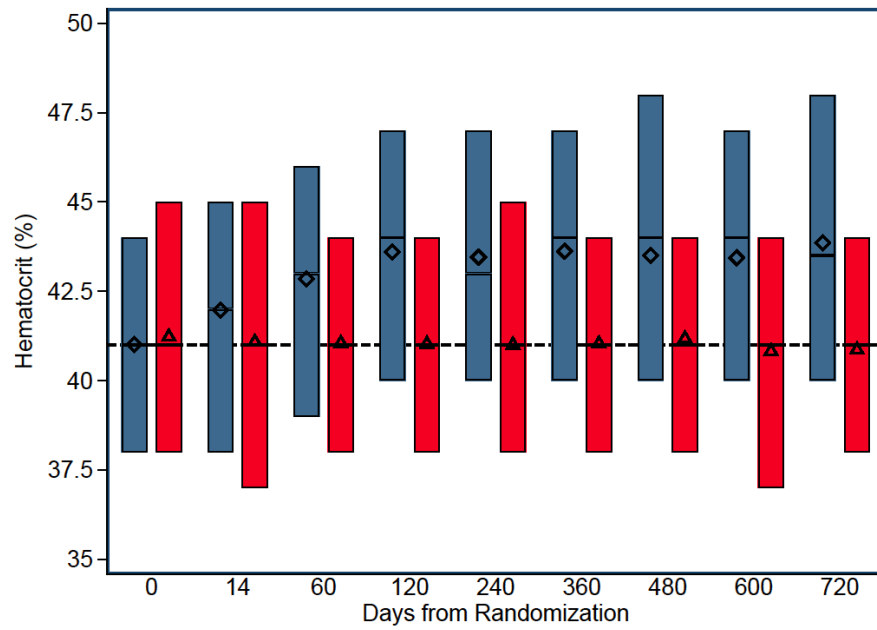

No Diabetes (n=2605)

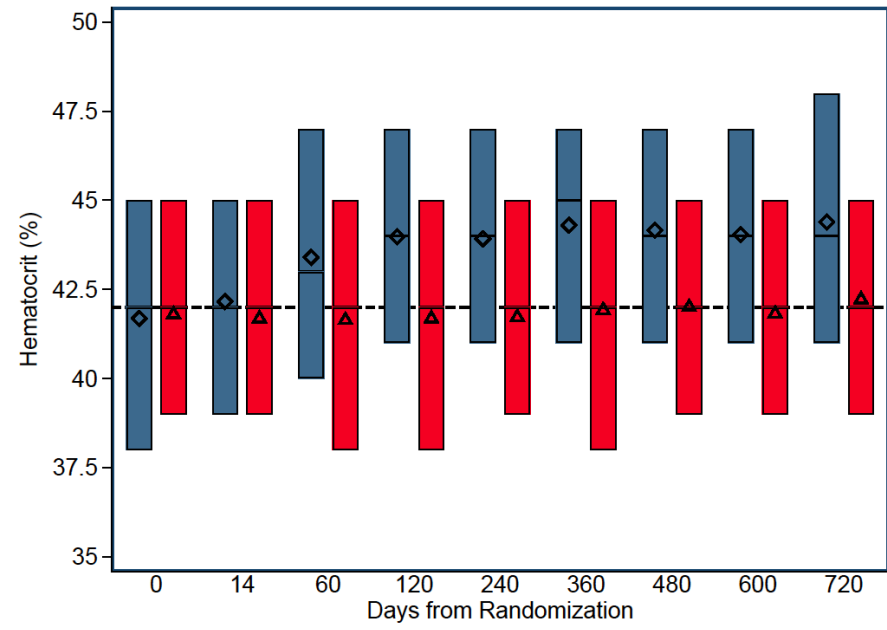

 Dapagliflozin  Placebo

eTable 1: Treatment effect of dapagliflozin versus placebo in patients with and without diabetes at baseline – sensitivity analysis accounting for trial site

| Outcome                                                                                   | Hazard ratio (95% CI)       | Interaction P Value |
|-------------------------------------------------------------------------------------------|-----------------------------|---------------------|
| <b>Efficacy Outcomes</b>                                                                  |                             |                     |
| Cardiovascular death, hospitalization for heart failure or an urgent heart failure visit* |                             |                     |
| No diabetes (n=2605)                                                                      | 0.72 (0.58 to 0.90); p=.004 | .96                 |
| Diabetes (n=2139)                                                                         | 0.76 (0.62 to 0.92); p=.006 |                     |
| Hospitalization for heart failure or an urgent heart failure visit                        |                             |                     |
| No diabetes (n=2605)                                                                      | 0.56 (0.42 to 0.75); p<.001 | 1.0                 |
| Diabetes (n=2139)                                                                         | 0.76 (0.60 to 0.98); p=.034 |                     |
| Hospitalization for heart failure                                                         |                             |                     |
| No diabetes (n=2605)                                                                      | 0.57 (0.43 to 0.77); p<.001 | 1.0                 |
| Diabetes (n=2139)                                                                         | 0.77 (0.60 to 0.98); p=.036 |                     |
| Urgent heart failure visit                                                                |                             |                     |
| No diabetes (n=2605)                                                                      | 0.11 (0.02 to 0.55); p=.007 | 1.0                 |
| Diabetes (n=2139)                                                                         | 0.40 (0.14 to 1.15); p=.088 |                     |
| Cardiovascular Death                                                                      |                             |                     |
| No diabetes (n=2605)                                                                      | 0.88 (0.66 to 1.17); p=.38  | .64                 |
| Diabetes (n=2139)                                                                         | 0.80 (0.61 to 1.04); p=.09  |                     |
| <b>Secondary Outcomes</b>                                                                 |                             |                     |
| Cardiovascular death or hospitalization for heart failure                                 |                             |                     |
| No diabetes (n=2605)                                                                      | 0.74 (0.59 to 0.92); p=.007 | .98                 |
| Diabetes (n=2139)                                                                         | 0.76 (0.62 to 0.93); p=.007 |                     |
| Death from any cause                                                                      |                             |                     |
| No diabetes (n=2605)                                                                      | 0.92 (0.71 to 1.19); p=.52  | .41                 |
| Diabetes (n=2139)                                                                         | 0.78 (0.61 to 0.99); p=.043 |                     |
| Worsening kidney function†                                                                |                             |                     |
| No diabetes (n=2605)                                                                      | 0.89 (0.34 to 2.36); p=.82  | .1.0                |
| Diabetes (n=2139)                                                                         | 0.72 (0.37 to 1.40); p=.33  |                     |

C.I. = confidence interval.

\*Analyzed as time-to-first occurrence of any of these events; an urgent visit was one in which intravenous therapy for heart failure was administered.

Hazard ratios and 95% confidence intervals were estimated with the use of Cox regression models, with a history of hospitalization for heart failure, treatment-group assignment and trial site as explanatory variables.

†Worsening renal function – composite outcome analyzed as time-to-first occurrence of 50% or greater reduction in eGFR sustained for at least 28 days, endstage renal disease (ESRD) or death from renal causes. ESRD consisted of eGFR below 15 ml/min/1.73m<sup>2</sup> sustained for at least 28 days, chronic dialysis treatment (sustained for at least 28 days) or kidney transplantation.
